# Supplementary material for: Inversion of the Slip Distribution of the 2017 Ms7.0 Jiuzhaigou Earthquake From InSAR
Source: Research Square preprint supplement (doi:10.21203/rs.3.rs-125202/v1), 2020-12-11
Supplement: Supplementary file 1 [file b761511f4869738555f95bac.xlsx]

## Sheet: Sheet1
		Models	Faults	Strike	Dip	Average error (cm)	Maximum residual	Moment magnitude
							(cm)	( )
		One-fault	Main fault	154°	51°	2.11	-9	6.4
		Two-fault	Northern fault	154°	66°	2.03	-6.84	6.4
			Southern fault	147°	74°
		Three-fault	Northern fault	156°	77°	1.98	-6.02	6.4
			Southern fault	147°	82°
			Secondary fault	204°	80°
		Two-fault	Main fault	151°	77°	1.88	-4.87	6.5
			Secondary fault	196°	77°
